# Supplementary material for: Induction of formation and conformational conversion of DNA G-quadruplexes by fangchinoline
Source: Royal Society of Chemistry journal article supplement (doi:10.1039/c4ay01881h), 2014-09-12
Supplement: c4ay01881h1.pdf [file c4ay01881h1.pdf]

# Induction of formation and conformational conversion of DNA G-quadruplex by fangchinoline

Wei Tan,<sup>[1]</sup> Han Chen,<sup>[1]</sup> Jiang Zhou,\*<sup>[1]</sup> Ming Xu,<sup>[2]</sup> and Gu Yuan\*<sup>[1]</sup>

## Supporting information

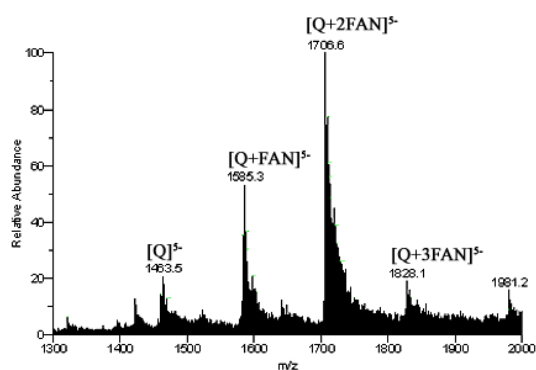

Figure S1. ESI-MS spectra of FAN binding with 10  $\mu$ M *bc/2* G-quadruplex at 4:1 molar ratio in 50mM  $\text{NH}_4\text{OAc}$  and 20%  $\text{CH}_3\text{OH}$ .
